# Supplementary material
Source: publisher figshare collection journal article supplement (https://karger.figshare.com/ndownloader/files/27943998)
Supplement: Supplementary file 1 [file 27943998]

Video. Live subtraction under road map guidance demonstrating “inflation” of the Comaneci to push the coil mass into the aneurysmal sac away from its dysplastic neck.

Early experience with Comaneci: Assist device for intracranial aneurysm coiling
